# Supplementary material for: B lymphocytes undergo TLR2-dependent apoptosis upon Shigella infection
Source: PubMed Central journal article supplement — J Exp Med. 2014 Jun 2;211(6):1215–29. doi: 10.1084/jem.20130914 (PMC4042640; doi:10.1084/jem.20130914), 2014-06-02
Supplement: supp_jem.20130914_JEM_20130914_sm.pdf [file supp_jem.20130914_JEM_20130914_sm.pdf]

## SUPPLEMENTAL MATERIAL

Nothelfer et al., <http://www.jem.org/cgi/content/full/jem.20130914/DC1>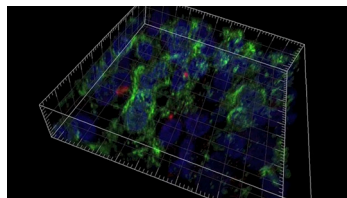

**Video 1.** Animation of confocal imaging of 150- $\mu\text{m}$ -thick tissue sections which shows that *S. flexneri* is found intracellularly in B lymphocytes within ILFs. The animation moves through human colonic tissue after ex vivo infection by WT bacteria orthogonally. Bacteria were stained with an antibody specific for *S. flexneri* 5a (red) and B cells with anti-CD20cy (green). DAPI nuclei staining is shown in blue.

**Table S1.** Regulation of pro- and anti-apoptotic proteins after infection as assessed by a protein-based apoptosis array

| Protein name   | WT                           | T3SA <sup>-</sup> + IpaD     |
|----------------|------------------------------|------------------------------|
| Bad            | 1.27 $\pm$ 0.09 <sup>a</sup> | 1.37 $\pm$ 0.21 <sup>b</sup> |
| Bax            | 1.38 $\pm$ 0.19 <sup>b</sup> | 1.21 $\pm$ 0.11 <sup>a</sup> |
| Bcl-2          | 2.00 $\pm$ 0.44 <sup>b</sup> | 1.91 $\pm$ 0.23 <sup>b</sup> |
| Bcl-x          | 1.11 $\pm$ 0.36 <sup>a</sup> | 0.61 $\pm$ 0.15 <sup>c</sup> |
| Pro-Casp 3     | 0.94 $\pm$ 0.03              | 0.93 $\pm$ 0.01              |
| Cleaved Casp 3 | 0.90 $\pm$ 0.10              | 1.00 $\pm$ 0.04              |
| Catalase       | 1.03 $\pm$ 0.07              | 1.03 $\pm$ 0.10              |
| clAP-1         | 0.97 $\pm$ 0.16              | 1.04 $\pm$ 0.14              |
| c-IAP 2        | 0.76 $\pm$ 0.07 <sup>d</sup> | 0.91 $\pm$ 0.17              |
| Claspin        | 0.78 $\pm$ 0.09 <sup>d</sup> | 1.03 $\pm$ 0.15              |
| Clusterin      | 1.29 $\pm$ 0.40 <sup>a</sup> | 1.08 $\pm$ 0.17              |
| Cyt c          | 1.50 $\pm$ 0.09 <sup>b</sup> | 1.57 $\pm$ 0.13 <sup>b</sup> |
| TRAIL R1       | 0.93 $\pm$ 0.08              | 0.82 $\pm$ 0.01 <sup>d</sup> |
| TRAIL R2       | 0.95 $\pm$ 0.04              | 0.78 $\pm$ 0.12 <sup>d</sup> |
| FADD           | 1.27 $\pm$ 0.16 <sup>b</sup> | 1.37 $\pm$ 0.22 <sup>b</sup> |
| Fas            | 0.86 $\pm$ 0.26 <sup>d</sup> | 0.75 $\pm$ 0.12 <sup>d</sup> |
| HIF-1a         | 0.97 $\pm$ 0.03              | 0.91 $\pm$ 0.13              |
| HO-1           | 1.02 $\pm$ 0.13              | 0.75 $\pm$ 0.12 <sup>d</sup> |
| HO-2           | 1.05 $\pm$ 0.20              | 0.91 $\pm$ 0.16              |
| HSP27          | 1.06 $\pm$ 0.01              | 0.99 $\pm$ 0.10              |
| HSP60          | 1.03 $\pm$ 0.29              | 0.96 $\pm$ 0.14              |
| HSP70          | 0.85 $\pm$ 0.10 <sup>d</sup> | 0.93 $\pm$ 0.07              |
| HTRA2          | 1.03 $\pm$ 0.09              | 1.06 $\pm$ 0.02              |
| Livin          | 1.13 $\pm$ 0.13 <sup>a</sup> | 1.05 $\pm$ 0.08              |
| PON2           | 1.02 $\pm$ 0.15              | 1.10 $\pm$ 0.06 <sup>a</sup> |
| p21            | 0.90 $\pm$ 0.05              | 1.28 $\pm$ 0.08 <sup>a</sup> |
| p27            | 0.94 $\pm$ 0.10              | 1.14 $\pm$ 0.14 <sup>a</sup> |
| p-p53(S15)     | 0.89 $\pm$ 0.10 <sup>d</sup> | 0.99 $\pm$ 0.08              |
| p-p53 (S46)    | 0.76 $\pm$ 0.05 <sup>d</sup> | 0.93 $\pm$ 0.21              |
| p-p53 (S392)   | 0.71 $\pm$ 0.15 <sup>d</sup> | 0.80 $\pm$ 0.05 <sup>d</sup> |
| p-Rad17 (S635) | 1.12 $\pm$ 0.32 <sup>a</sup> | 1.03 $\pm$ 0.15              |
| SMAC           | 1.05 $\pm$ 0.07              | 1.05 $\pm$ 0.14              |
| Survivin       | 0.86 $\pm$ 0.16 <sup>d</sup> | 0.81 $\pm$ 0.15 <sup>d</sup> |
| TNF R1         | 0.92 $\pm$ 0.14              | 0.75 $\pm$ 0.15 <sup>d</sup> |
| XIAP           | 0.92 $\pm$ 0.10              | 1.15 $\pm$ 0.13 <sup>a</sup> |

Pro- and anti-apoptotic protein levels for the entire assay are shown for infection with WT and T3SA<sup>-</sup> + IpaD as fold change over T3SA<sup>-</sup> alone. Fold changes are color-coded for the detection of increased (green) or decreased (red) protein amounts. Data are presented as mean  $\pm$  SEM of three independent experiments.

<sup>a</sup>Fold change over T3SA<sup>-</sup>: >1.1 .

<sup>b</sup>Fold change over T3SA<sup>-</sup>: >1.3.

<sup>c</sup>Fold change over T3SA<sup>-</sup>: <0.7.

<sup>d</sup>Fold change over T3SA<sup>-</sup>: <0.9.

**Table S2.** List of *S. flexneri* strains used for infections

| Name                       | Description                                                                      | Reference               |
|----------------------------|----------------------------------------------------------------------------------|-------------------------|
| WT                         | M90T, <i>S. flexneri</i> 5a WT                                                   | Sansonetti et al., 1982 |
| T3SA <sup>-</sup>          | SF401, <i>mxiD</i> mutant, unable to assemble T3SA                               | Allaoui et al., 1993    |
| WT GFP                     | GFP-expressing M90T                                                              | Jaumouillé et al., 2008 |
| T3SA <sup>-</sup> GFP      | GFP-expressing <i>mxiD</i>                                                       | Jaumouillé et al., 2008 |
| <i>icsA</i>                | SC557, <i>icsA</i> mutant, non-motile in cell cytoplasm                          | Bernardini et al., 1989 |
| <i>mxiE</i>                | SF1060, <i>mxiE</i> mutant, transcription factor for several virulence effectors | Mavris et al., 2002     |
| <i>spa15</i>               | SF1601, <i>spa15</i> mutant, chaperone of several virulence effectors            | Page et al., 2002       |
| <i>ipaC</i>                | SF621, <i>ipaC</i> mutant, translocator                                          | Ménard et al., 1993     |
| <i>ipaD</i>                | SF622, <i>ipaD</i> mutant, needle tip protein                                    | Ménard et al., 1993     |
| <i>ipaD</i> /p <i>ipaD</i> | SF622 (pD1), complemented <i>ipaD</i> mutant                                     | Ménard et al., 1993     |

The name used throughout the text is given with a description of the strain and the reference that first describes it.

**Table S3.** List of DNA oligonucleotide primers used for gene expression quantification

| Gene name | Forward sequence (5'–3')   | Reverse sequence (5'–3')        | Reference                                                    |
|-----------|----------------------------|---------------------------------|--------------------------------------------------------------|
| TLR1      | CAGTGCTGGTACACGCATGGT      | TTTCAAAAACCGTGTCTGTTAAGAGA      | Zarembek and Godowski, 2002                                  |
| TLR2      | GGCCAGCAAATTACCTGTGTG      | AGGCGGACATCCTGAACCT             | Zarembek and Godowski, 2002; QIAGEN quantitech; SABIsciences |
| TLR3      | TGGTTGGGCCACCTAGAAGTA      | TCTCCATTCCTGGCCTGTG             | Zarembek and Godowski, 2002                                  |
| TLR4      | CAGAGTTTCTGCAATGGATCA      | GCTTATCTGAAGGTGTTGCACAT         | Zarembek and Godowski, 2002                                  |
| TLR5      | TGCCTGAAGCCTTCAGTTATG      | CCAACCACCACCATGATGAG            | Zarembek and Godowski, 2002                                  |
| TLR6      | GAAGAAGAACAACCCTTTAGGATAGC | AGGCAAACAATAATGGAAGCTT          | Zarembek and Godowski, 2002                                  |
| TLR7      | ATCTTGGCACCTCTCATGCT       | AAGAAITTTGCTCTTCAGTGTTCA        | In house, QIAGEN quantitech                                  |
| TLR8      | TTATGTGTTCCAGGAAGCTCAGAGAA | TAATACCCAAGTTGATAGT CGATAAGTTTG | Zarembek and Godowski, 2002                                  |
| TLR9      | GGACCTCTGGTACTGCTTCCA      | AAGCTCGTTGTACCCAGTCT            | Zarembek and Godowski, 2002; QIAGEN quantitech               |
| TLR10     | TGTTATGACAGCAGAGGGTGATG    | GAGTTGAAAAAGGAGGTTATAGGATAAATC  | Zarembek and Godowski, 2002                                  |

Forward and reverse sequences for each gene are provided alongside the original reference in which it was described. In the case in which multiple primer probes were used to robustly assess expression levels, the commercial provider is also indicated.

**Table S4.** List of antibodies used for immunoblotting

| Antigen               | Source                         | Buffer          | Dilution |
|-----------------------|--------------------------------|-----------------|----------|
| Actin                 | Sigma-Aldrich                  | 3% milk in TBST | 1:5,000  |
| Bad                   | Santa Cruz Biotechnology, Inc. | 3% milk in TBST | 1:200    |
| Bak                   | Cell Signaling Technology      | 3% milk in TBST | 1:5,000  |
| Bax                   | Millipore                      | 3% milk in TBST | 1:1000   |
| Bcl-2                 | Santa Cruz Biotechnology, Inc. | 3% milk in TBST | 1:200    |
| Bcl-xl                | Cell Signaling Technology      | 3% milk in TBST | 1:1,000  |
| I $\kappa$ B $\alpha$ | Santa Cruz Biotechnology, Inc. | 3% milk in TBST | 1:1,000  |
| FADD                  | BD                             | TBST            | 1:250    |

Antigen specificity, company, and conditions used for probing are given for each antibody.

## REFERENCES

- Allaoui, A., P.J. Sansonetti, and C. Parsot. 1993. MxiD, an outer membrane protein necessary for the secretion of the *Shigella flexneri* Ipa invasins. *Mol. Microbiol.* 7:59–68. <http://dx.doi.org/10.1111/j.1365-2958.1993.tb01097.x>
- Bernardini, M.L., J. Mounier, H. d'Hauteville, M. Coquis-Rondon, and P.J. Sansonetti. 1989. Identification of icsA, a plasmid locus of *Shigella flexneri* that governs bacterial intra- and intercellular spread through interaction with F-actin. *Proc. Natl. Acad. Sci. USA.* 86:3867–3871. <http://dx.doi.org/10.1073/pnas.86.10.3867>
- Jaumouillé, V., O. Francetic, P.J. Sansonetti, and G. Tran Van Nhieu. 2008. Cytoplasmic targeting of IpaC to the bacterial pole directs polar type III secretion in *Shigella*. *EMBO J.* 27:447–457. <http://dx.doi.org/10.1038/sj.emboj.7601976>
- Mavris, M., A.L. Page, R. Tournebize, B. Demers, P. Sansonetti, and C. Parsot. 2002. Regulation of transcription by the activity of the *Shigella flexneri* type III secretion apparatus. *Mol. Microbiol.* 43:1543–1553. <http://dx.doi.org/10.1046/j.1365-2958.2002.02836.x>
- Ménard, R., P.J. Sansonetti, and C. Parsot. 1993. Nonpolar mutagenesis of the ipa genes defines IpaB, IpaC, and IpaD as effectors of *Shigella flexneri* entry into epithelial cells. *J. Bacteriol.* 175:5899–5906.
- Page, A.-L., P. Sansonetti, and C. Parsot. 2002. Spa15 of *Shigella flexneri*, a third type of chaperone in the type III secretion pathway. *Mol. Microbiol.* 43:1533–1542. <http://dx.doi.org/10.1046/j.1365-2958.2002.02835.x>
- Sansonetti, P.J., D.J. Kopecko, and S.B. Formal. 1982. Involvement of a plasmid in the invasive ability of *Shigella flexneri*. *Infect. Immun.* 35:852–860.
- Zarembek, K.A., and P.J. Godowski. 2002. Tissue expression of human Toll-like receptors and differential regulation of Toll-like receptor mRNAs in leukocytes in response to microbes, their products, and cytokines. *J. Immunol.* 168:554–561. <http://dx.doi.org/10.4049/jimmunol.168.2.554>
